# Supplementary material for: Immune cells and inflammatory mediators cause endothelial dysfunction in a vascular microphysiological system
Source: Royal Society of Chemistry journal article supplement (doi:10.1039/d3lc00824j), 2024-01-01
Supplement: d3lc00824j2.pdf [file d3lc00824j2.pdf]

|                                | MPS      |          |                |               |                   | 2D         |
|--------------------------------|----------|----------|----------------|---------------|-------------------|------------|
|                                | Control  | Mix 48h  | Embedded PBMCs | Luminal PBMCs | Luminal Act PBMCs | Control 2D |
| <b>FGF-2</b>                   | 389.99   | 846.60   | 787.57         | 1398.40       | 781.16            | 0.00       |
| <b>PDGF-AA</b>                 | 582.15   | 568.73   | 716.56         | 1201.82       | 1296.75           | 1156.62    |
| <b>PDGF-AB</b>                 | 4562.75  | 12902.73 | 6745.12        | 3343.60       | 4694.35           | 1232.47    |
| <b>G-CSF</b>                   | 153.43   | 8025.27  | 5514.20        | 8227.04       | 5392.07           | 116.37     |
| <b>GM-CSF</b>                  | 19.76    | 2414.42  | 573.25         | 1473.37       | 1941.74           | 2.81       |
| <b>CXCL1</b>                   | 11129.86 | 11188.95 | 10898.40       | 6638.38       | 10639.63          | 6602.65    |
| <b>CXCL10</b>                  | 103.23   | 12376.98 | 211.06         | 369.54        | 3970.14           | 60.62      |
| <b>CX3CL1</b>                  | 43.60    | 1389.57  | 65.39          | 73.94         | 185.67            | 35.65      |
| <b>CCL2</b>                    | 9342.40  | 8794.89  | 9972.42        | 13872.36      | 9508.84           | 5076.56    |
| <b>CCL3</b>                    | 1.37     | 3.32     | 6.94           | 353.36        | 775.90            | 0.36       |
| <b>CCL4</b>                    | 1.22     | 2.23     | 3.47           | 310.71        | 404.90            | 0.80       |
| <b>CCL5</b>                    | 20.80    | 3254.19  | 89.73          | 273.67        | 3019.76           | 10.30      |
| <b>CCL7</b>                    | 104.86   | 695.57   | 122.95         | 146.91        | 513.71            | 35.70      |
| <b>CCL22</b>                   | 8.18     | 12.72    | 13.31          | 20.44         | 50.61             | 6.56       |
| <b>TNF<math>\alpha</math></b>  | 4.29     | 8853.45  | 9.57           | 31.47         | 117.68            | 1.19       |
| <b>IFN<math>\alpha</math>2</b> | 40.48    | 50.35    | 58.45          | 81.42         | 41.87             | 36.36      |
| <b>IFN<math>\gamma</math></b>  | 1.39     | 1.69     | 1.83           | 3.05          | 83.38             | 1.19       |
| <b>IL-1RA</b>                  | 9.00     | 12.82    | 12.99          | 26.43         | 30.42             | 7.20       |
| <b>IL-1a</b>                   | 8.23     | 14.80    | 10.82          | 25.36         | 78.02             | 4.75       |
| <b>IL-1<math>\beta</math></b>  | 0.25     | 0.95     | 2.55           | 87.15         | 1563.65           | 0.19       |
| <b>IL-2</b>                    | 0.58     | 1.16     | 1.03           | 0.92          | 30.79             | 0.37       |
| <b>IL-4</b>                    | 20.91    | 34.29    | 24.20          | 35.43         | 21.97             | 13.48      |
| <b>IL-6</b>                    | 71.32    | 4276.20  | 925.45         | 2857.18       | 1628.46           | 143.60     |
| <b>IL-10</b>                   | 2.42     | 3.10     | 3.92           | 34.99         | 94.39             | 1.96       |

Supplementary Table 1 – Multiplexed analysis of secretion media from vascular MPS and 2D cultures.

Concentrations of different factors are listed in ng/ml.

| Fold difference                | MPS                |                           |                          |                              |                                    | Control 2D vs 3D |
|--------------------------------|--------------------|---------------------------|--------------------------|------------------------------|------------------------------------|------------------|
|                                | Mix 48h vs Control | Embedded PBMCs vs Control | Luminal PBMCs vs Control | Luminal Act PBMCs vs Control | Luminal Act PBMCs vs Luminal PBMCs |                  |
| <b>FGF-2</b>                   | 2.17               | 2.02                      | 3.59                     | 2.00                         | 0.56                               | 0.00             |
| <b>PDGF-AA</b>                 | 0.98               | 1.23                      | 2.06                     | 2.23                         | 1.08                               | 1.99             |
| <b>PDGF-AB</b>                 | 2.83               | 1.48                      | 0.73                     | 1.03                         | 1.40                               | 0.27             |
| <b>G-CSF</b>                   | 52.31              | 35.94                     | 53.62                    | 35.14                        | 0.66                               | 0.76             |
| <b>GM-CSF</b>                  | 122.18             | 29.01                     | 74.56                    | 98.26                        | 1.32                               | 0.14             |
| <b>CXCL1</b>                   | 1.01               | 0.98                      | 0.60                     | 0.96                         | 1.60                               | 0.59             |
| <b>CXCL10</b>                  | 119.90             | 2.04                      | 3.58                     | 38.46                        | 10.74                              | 0.59             |
| <b>CX3CL1</b>                  | 31.87              | 1.50                      | 1.70                     | 4.26                         | 2.51                               | 0.82             |
| <b>CCL2</b>                    | 0.94               | 1.07                      | 1.48                     | 1.02                         | 0.69                               | 0.54             |
| <b>CCL3</b>                    | 2.42               | 5.07                      | 258.11                   | 566.75                       | 2.20                               | 0.26             |
| <b>CCL4</b>                    | 1.83               | 2.84                      | 254.61                   | 331.80                       | 1.30                               | 0.65             |
| <b>CCL5</b>                    | 156.44             | 4.31                      | 13.16                    | 145.17                       | 11.03                              | 0.50             |
| <b>CCL7</b>                    | 6.63               | 1.17                      | 1.40                     | 4.90                         | 3.50                               | 0.34             |
| <b>CCL22</b>                   | 1.56               | 1.63                      | 2.50                     | 6.19                         | 2.48                               | 0.80             |
| <b>TNF<math>\alpha</math></b>  | 2066.03            | 2.23                      | 7.34                     | 27.46                        | 3.74                               | 0.28             |
| <b>IFN<math>\alpha</math>2</b> | 1.24               | 1.44                      | 2.01                     | 1.03                         | 0.51                               | 0.90             |
| <b>IFN<math>\gamma</math></b>  | 1.22               | 1.32                      | 2.20                     | 60.11                        | 27.32                              | 0.86             |
| <b>IL-1RA</b>                  | 1.42               | 1.44                      | 2.94                     | 3.38                         | 1.15                               | 0.80             |
| <b>IL-1a</b>                   | 1.80               | 1.32                      | 3.08                     | 9.48                         | 3.08                               | 0.58             |
| <b>IL-1<math>\beta</math></b>  | 3.80               | 10.15                     | 347.13                   | 6228.13                      | 17.94                              | 0.76             |
| <b>IL-2</b>                    | 2.00               | 1.76                      | 1.58                     | 52.82                        | 33.40                              | 0.64             |
| <b>IL-4</b>                    | 1.64               | 1.16                      | 1.69                     | 1.05                         | 0.62                               | 0.64             |
| <b>IL-6</b>                    | 59.95              | 12.98                     | 40.06                    | 22.83                        | 0.57                               | 2.01             |
| <b>IL-10</b>                   | 1.28               | 1.62                      | 14.47                    | 39.03                        | 2.70                               | 0.81             |

Supplementary Table 2 – Fold differences in concentration of secretion media from vascular MPS and 2D cultures.
