# Supplementary figures and images for: Immune cells and inflammatory mediators cause endothelial dysfunction in a vascular microphysiological system
Source: Royal Society of Chemistry journal article supplement (doi:10.1039/d3lc00824j), 2024-01-01

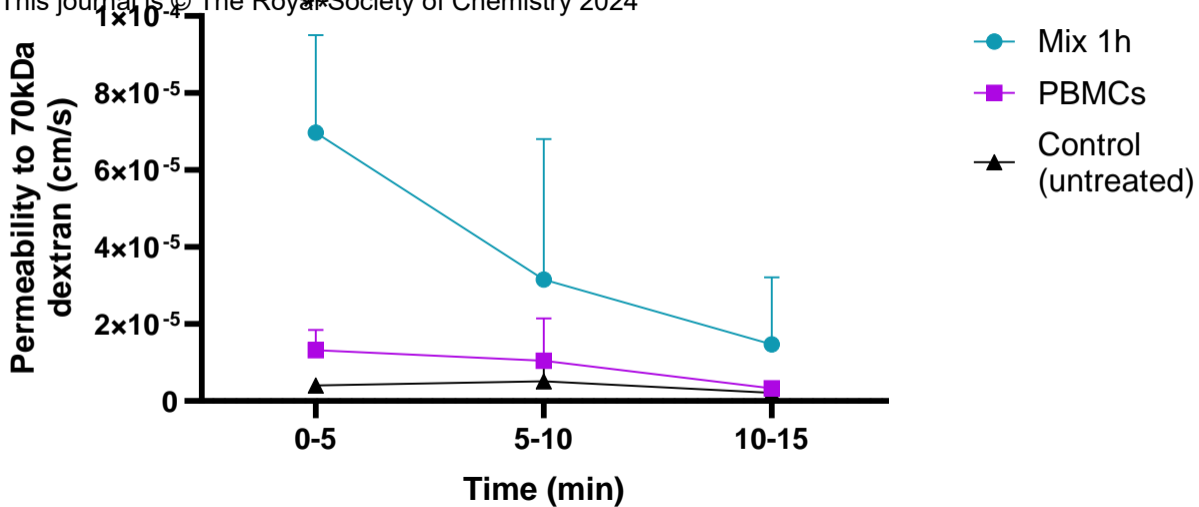

Supplement: d3lc00824j1.pdf [file d3lc00824j1.pdf]
